# Supplementary material
Source: publisher figshare collection journal article supplement (https://tandf.figshare.com/ndownloader/files/17823452)
Supplement: Supplementary file 1 [file 17823452]

**APPENDIX**

**Table A1.** AIS 3 extremity injury sample sizes for calculation of DR and DRMAIS for each age group (I=Total Injured and D=Total Disabled). Injuries with the symbol (--) indicate injuries not found on that age group’s top 95% list. A total of 22 AIS 3 injuries are listed.

|  | **Pediatrics (7-18 YO)** | | | | | | | |
| --- | --- | --- | --- | --- | --- | --- | --- | --- |
| **AIS Code** | **Body Region** | **I** | **D** | **DR** | **I** | **D** | **DRMAIS** |
| 7110003 | Upper extremity | 20 | 4 | 20.0% | 15 | 2 | 13.3% |
| 7130003 | Upper extremity | 17 | 1 | 5.9% | 17 | 1 | 5.9% |
| 7526043 | Upper extremity | 689 | 206 | 29.9% | 508 | 104 | 20.5% |
| 7528043 | Upper extremity | 550 | 149 | 27.1% | 423 | 81 | 19.1% |
| 7532043 | Upper extremity | 430 | 116 | 27.0% | 332 | 61 | 18.4% |
| 8404063 | Knee | -- | -- | -- | -- | -- | -- |
| 8516143 | Other lower extremity | 100 | 29 | 29.0% | 78 | 16 | 20.5% |
| 8518003 | Other lower extremity | 435 | 113 | 26.0% | 372 | 83 | 22.3% |
| 8518013 | Other lower extremity | 83 | 35 | 42.2% | 62 | 18 | 29.0% |
| 8518043 | Knee | 94 | 27 | 28.7% | 71 | 16 | 22.5% |
| 8518083 | Hip | 85 | 31 | 36.5% | 58 | 15 | 25.9% |
| 8518103 | Hip | 91 | 36 | 39.6% | 71 | 23 | 32.4% |
| 8518123 | Hip | 147 | 51 | 34.7% | 112 | 30 | 26.8% |
| 8518143 | Lower extremity shaft | 2335 | 714 | 30.6% | 1907 | 470 | 24.6% |
| 8518183 | Lower extremity shaft | 164 | 53 | 32.3% | 130 | 36 | 27.7% |
| 8518223 | Knee | 70 | 38 | 54.3% | 48 | 23 | 47.9% |
| 8526043 | Pelvis | 1017 | 435 | 42.8% | 713 | 253 | 35.5% |
| 8528003 | Pelvis | 573 | 229 | 40.0% | 352 | 108 | 30.7% |
| 8530003 | Pelvis | 549 | 173 | 31.5% | 395 | 99 | 25.1% |
| 8534053 | Other lower extremity | 44 | 16 | 36.4% | 39 | 12 | 30.8% |
| 8534083 | Knee | 109 | 45 | 41.3% | 78 | 25 | 32.1% |
| 8534223 | Lower extremity shaft | 394 | 142 | 36.0% | 312 | 85 | 27.2% |

|  | **Young Adults (19-45 YO)** | | | | | | |
| --- | --- | --- | --- | --- | --- | --- | --- |
| **AIS Code** | **Body Region** | **I** | **D** | **DR** | **I** | **D** | **DRMAIS** |
| 7110003 | Upper extremity | -- | -- | -- | -- | -- | -- |
| 7130003 | Upper extremity | -- | -- | -- | -- | -- | -- |
| 7526043 | Upper extremity | 1754 | 474 | 27.0% | 1292 | 257 | 19.9% |
| 7528043 | Upper extremity | 1631 | 400 | 24.5% | 1296 | 246 | 19.0% |
| 7532043 | Upper extremity | 1587 | 457 | 28.8% | 1236 | 271 | 21.9% |
| 8404063 | Knee | 72 | 36 | 50.0% | 53 | 23 | 43.4% |
| 8516143 | Other lower extremity | 519 | 156 | 30.1% | 439 | 116 | 26.4% |
| 8518003 | Other lower extremity | 899 | 349 | 38.8% | 721 | 235 | 32.6% |
| 8518013 | Other lower extremity | 183 | 69 | 37.7% | 147 | 49 | 33.3% |
| 8518043 | Knee | 403 | 156 | 38.7% | 317 | 111 | 35.0% |
| 8518083 | Hip | 407 | 132 | 32.4% | 320 | 96 | 30.0% |
| 8518103 | Hip | 437 | 165 | 37.8% | 323 | 113 | 35.0% |
| 8518123 | Hip | 621 | 225 | 36.2% | 463 | 145 | 31.3% |
| 8518143 | Lower extremity shaft | 5116 | 1516 | 29.6% | 4148 | 1034 | 24.9% |
| 8518183 | Lower extremity shaft | 514 | 160 | 31.1% | 405 | 98 | 24.2% |
| 8518223 | Knee | 264 | 118 | 44.7% | 210 | 83 | 39.5% |
| 8526043 | Pelvis | 3315 | 1304 | 39.3% | 2318 | 775 | 33.4% |
| 8528003 | Pelvis | 1262 | 538 | 42.6% | 766 | 266 | 34.7% |
| 8530003 | Pelvis | 1061 | 392 | 36.9% | 729 | 223 | 30.6% |
| 8534053 | Other lower extremity | 155 | 62 | 40.0% | 125 | 42 | 33.6% |
| 8534083 | Knee | 879 | 306 | 34.8% | 697 | 204 | 29.3% |
| 8534223 | Lower extremity shaft | 1273 | 460 | 36.1% | 1002 | 296 | 29.5% |

|  | **Middle-Aged Adults (46-65 YO)** | | | | | | | |
| --- | --- | --- | --- | --- | --- | --- | --- | --- |
| **AIS Code** | **Body Region** | **I** | **D** | **DR** | **I** | **D** | **DRMAIS** |
| 7110003 | Upper extremity | -- | -- | -- | -- | -- | -- |
| 7130003 | Upper extremity | -- | -- | -- | -- | -- | -- |
| 7526043 | Upper extremity | 1597 | 603 | 37.8% | 1141 | 344 | 30.1% |
| 7528043 | Upper extremity | 1932 | 707 | 36.6% | 1484 | 430 | 29.0% |
| 7532043 | Upper extremity | 1671 | 600 | 35.9% | 1270 | 368 | 29.0% |
| 8404063 | Knee | 33 | 19 | 57.6% | 23 | 11 | 47.8% |
| 8516143 | Other lower extremity | 639 | 253 | 39.6% | 510 | 175 | 34.3% |
| 8518003 | Other lower extremity | 671 | 292 | 43.5% | 564 | 220 | 39.0% |
| 8518013 | Other lower extremity | 137 | 78 | 56.9% | 100 | 50 | 50.0% |
| 8518043 | Knee | 489 | 233 | 47.6% | 373 | 164 | 44.0% |
| 8518083 | Hip | 471 | 206 | 43.7% | 351 | 142 | 40.5% |
| 8518103 | Hip | 901 | 401 | 44.5% | 672 | 266 | 39.6% |
| 8518123 | Hip | 716 | 344 | 48.0% | 548 | 236 | 43.1% |
| 8518143 | Lower extremity shaft | 2713 | 1189 | 43.8% | 2125 | 831 | 39.1% |
| 8518183 | Lower extremity shaft | 440 | 192 | 43.6% | 346 | 133 | 38.4% |
| 8518223 | Knee | 638 | 359 | 56.3% | 465 | 237 | 51.0% |
| 8526043 | Pelvis | 3247 | 1634 | 50.3% | 2264 | 1055 | 46.6% |
| 8528003 | Pelvis | 972 | 459 | 47.2% | 612 | 258 | 42.2% |
| 8530003 | Pelvis | 853 | 337 | 39.5% | 573 | 196 | 34.2% |
| 8534053 | Other lower extremity | 183 | 72 | 39.3% | 151 | 50 | 33.1% |
| 8534083 | Knee | 1487 | 700 | 47.1% | 1167 | 508 | 43.5% |
| 8534223 | Lower extremity shaft | 958 | 401 | 41.9% | 765 | 279 | 36.5% |

|  | **Older Adults (66+ YO)** | | | | | | |
| --- | --- | --- | --- | --- | --- | --- | --- |
| **AIS Code** | **Body Region** | **I** | **D** | **DR** | **I** | **D** | **DRMAIS** |
| 7110003 | Upper extremity | -- | -- | -- | -- | -- | -- |
| 7130003 | Upper extremity | -- | -- | -- | -- | -- | -- |
| 7526043 | Upper extremity | 460 | 237 | 51.5% | 335 | 160 | 47.8% |
| 7528043 | Upper extremity | 637 | 293 | 46.0% | 495 | 195 | 39.4% |
| 7532043 | Upper extremity | 457 | 220 | 48.1% | 342 | 141 | 41.2% |
| 8404063 | Knee | 2 | 2 | 100.0% | 2 | 2 | 100.0% |
| 8516143 | Other lower extremity | 260 | 175 | 67.3% | 179 | 111 | 62.0% |
| 8518003 | Other lower extremity | 141 | 88 | 62.4% | 115 | 68 | 59.1% |
| 8518013 | Other lower extremity | 36 | 29 | 80.6% | 30 | 23 | 76.7% |
| 8518043 | Knee | 120 | 83 | 69.2% | 86 | 57 | 66.3% |
| 8518083 | Hip | 113 | 81 | 71.7% | 81 | 55 | 67.9% |
| 8518103 | Hip | 417 | 262 | 62.8% | 332 | 203 | 61.1% |
| 8518123 | Hip | 238 | 149 | 62.6% | 179 | 106 | 59.2% |
| 8518143 | Lower extremity shaft | 402 | 250 | 62.2% | 287 | 157 | 54.7% |
| 8518183 | Lower extremity shaft | 132 | 87 | 65.9% | 104 | 64 | 61.5% |
| 8518223 | Knee | 249 | 176 | 70.7% | 194 | 129 | 66.5% |
| 8526043 | Pelvis | 780 | 548 | 70.3% | 515 | 338 | 65.6% |
| 8528003 | Pelvis | 261 | 133 | 51.0% | 162 | 73 | 45.1% |
| 8530003 | Pelvis | 288 | 153 | 53.1% | 197 | 101 | 51.3% |
| 8534053 | Other lower extremity | 37 | 26 | 70.3% | 27 | 17 | 63.0% |
| 8534083 | Knee | 412 | 287 | 69.7% | 293 | 187 | 63.8% |
| 8534223 | Lower extremity shaft | 168 | 104 | 61.9% | 133 | 76 | 57.1% |

**Table A2**. Disability type by age group and upper versus lower extremity for occupants included in the disability risk (DR) calculation. L = locomotion, F = self-feeding, E = verbal expression, and α most frequent disability and β second-most frequent disability.

| **Age group** | **N Disabled** | **(%)** | | | | | | |
| --- | --- | --- | --- | --- | --- | --- | --- | --- |
| **L** | **F** | **E** | **L+F** | **L+E** | **F+E** | **L+F+E** |
| Pediatric, 7-18 yrs | 2,643 | 73.6α | 2.7 | 0.6 | 8.1 | 2.2 | 0.1 | 12.8β |
| Upper extremity | 476 | 58.6α | 9.5 | 0.4 | 11.8 | 1.9 | 0.0 | 17.9β |
| Lower extremity | 2,167 | 76.9α | 1.2 | 0.6 | 7.2 | 2.2 | 0.1 | 11.6β |
| Young adult, 19-45 yrs | 7,475 | 77.6α | 2.1 | 0.4 | 8.3 | 1.6 | 0.2 | 9.8β |
| Upper extremity | 1,331 | 66.3α | 7.1 | 0.5 | 12.2 | 1.2 | 0.2 | 12.5β |
| Lower extremity | 6,144 | 80.0α | 1.0 | 0.4 | 7.4 | 1.7 | 0.2 | 9.2β |
| Middle-aged, 46-65 yrs | 9,079 | 77.6α | 1.9 | 0.4 | 9.7β | 2.2 | 0.3 | 2.2 |
| Upper extremity | 1,910 | 65.2α | 5.5 | 0.6 | 15.2β | 2.2 | 0.5 | 10.7 |
| Lower extremity | 7,169 | 80.9α | 1.0 | 0.4 | 8.2β | 2.2 | 0.2 | 7.1 |
| Older adult, 66+ yrs | 3,383 | 66.1α | 2.2 | 0.3 | 16.4β | 1.8 | 0.2 | 12.9 |
| Upper extremity | 750 | 53.1α | 5.9 | 0.0 | 25.6β | 2.4 | 0.3 | 12.8 |
| Lower extremity | 2,633 | 69.8α | 1.2 | 0.4 | 13.8β | 1.6 | 0.2 | 13.0 |

**Table A3.** Disability type by age group and upper versus lower extremity for occupants included in the MAIS-adjusted disability risk (DRMAIS) calculation. L = locomotion, F = self-feeding, E = verbal expression, and α most frequent disability and β second-most frequent disability.

| **Age group** | **N Disabled** | **(%)** | | | | | | |
| --- | --- | --- | --- | --- | --- | --- | --- | --- |
| **L** | **F** | **E** | **L+F** | **L+E** | **F+E** | **L+F+E** |
| Pediatric, 7-18 yrs | 1,561 | 84.9α | 3.5 | 0.5 | 5.6β | 1.3 | 0.1 | 4.2 |
| Upper extremity | 249 | 65.5α | 16.1β | 0.4 | 12.0 | 1.2 | 0.0 | 4.8 |
| Lower extremity | 1,312 | 88.6α | 1.1 | 0.5 | 4.3β | 1.3 | 0.1 | 4.0 |
| Young adult, 19-45 yrs | 4,683 | 85.1α | 2.7 | 0.4 | 6.4β | 1.5 | 0.1 | 3.7 |
| Upper extremity | 774 | 72.1α | 10.5β | 0.4 | 10.5β | 1.3 | 0.1 | 5.2 |
| Lower extremity | 3,909 | 87.7α | 1.1 | 0.5 | 5.7β | 1.5 | 0.2 | 3.4 |
| Middle-aged, 46-65 yrs | 5,953 | 85.0α | 2.0 | 0.4 | 6.7β | 1.9 | 0.3 | 3.7 |
| Upper extremity | 1,142 | 72.8α | 7.5 | 0.4 | 11.8β | 1.8 | 0.4 | 5.3 |
| Lower extremity | 4,811 | 87.9α | 0.7 | 0.4 | 5.4β | 2.0 | 0.2 | 3.3 |
| Older adult, 66+ yrs | 2,263 | 73.4α | 2.6 | 0.2 | 14.1β | 1.5 | 0.2 | 8.0 |
| Upper extremity | 496 | 57.3α | 7.3 | 0.0 | 25.8β | 2.4 | 0.4 | 6.9 |
| Lower extremity | 1,767 | 77.9α | 1.3 | 0.3 | 10.8β | 1.2 | 0.1 | 8.4 |
